# Supplementary material for: In situ FTIR probe via CO electrooxidation: Pt-skin vs. Pt-skeleton surfaces
Source: Royal Society of Chemistry journal article supplement (doi:10.1039/d5ta09766e), 2026-01-01
Supplement: d5ta09766e1.pdf [file d5ta09766e1.pdf]

# Supporting Information

Benjamin J. Ransom, Alasdair R. Fairhurst, and Vojislav R. Stamenkovic

## Supplementary Figures

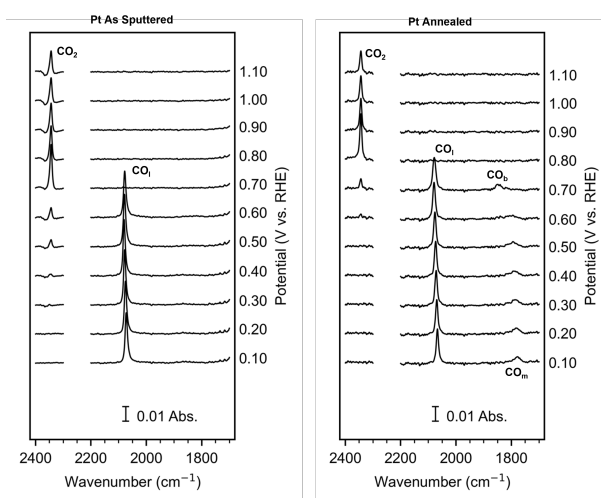

Figure S1: In Situ FTIR spectra of Pt as sputtered (left) and Pt annealed (right) samples. Collected in 0.5M sulfuric acid Ar purged electrolyte during CO stripping. Reference potential 1.2 V vs. RHE.

Table S1:  $H_{upd}$  and CO charge Ratios for listed samples

| Sample         | $H_{upd}$ ( $\mu C$ ) | CO ( $\mu C$ ) | Ratio |
|----------------|-----------------------|----------------|-------|
| Pt3Co Skeleton | 192                   | 390            | 1.01  |
| Pt3Co Skin     | 107                   | 336            | 1.57  |
| Pt3Ni Skeleton | 256                   | 534            | 1.04  |
| Pt3Ni Skin     | 116                   | 357            | 1.54  |
| Pt(111)        | 184                   | 385            | 1.04  |

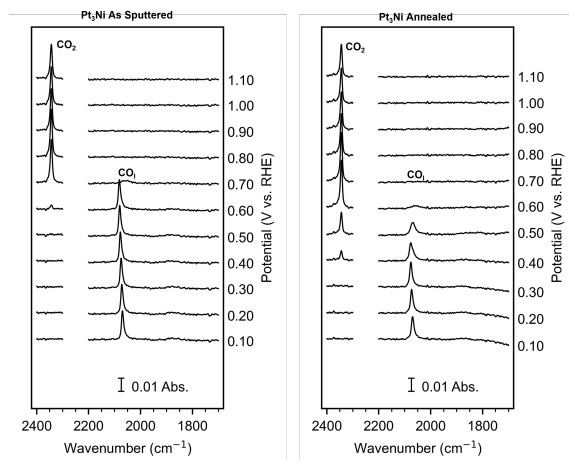

Figure S2: In Situ FTIR spectra of  $\text{Pt}_3\text{Ni}$  as sputtered (left) and  $\text{Pt}_3\text{Ni}$  annealed (right) samples. Collected in 0.5M sulfuric acid Ar purged electrolyte during CO stripping. Reference potential 1.2 V vs. RHE.

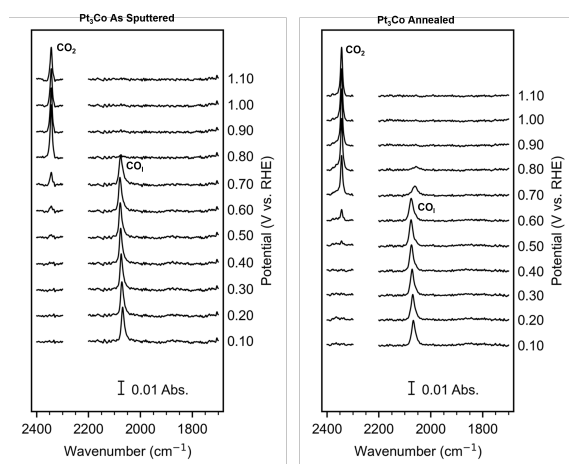

Figure S3: In Situ FTIR spectra of  $\text{Pt}_3\text{Co}$  as sputtered (left) and  $\text{Pt}_3\text{Co}$  annealed (right) samples. Collected in 0.5M sulfuric acid Ar purged electrolyte during CO stripping. Reference potential 1.2 V vs. RHE.

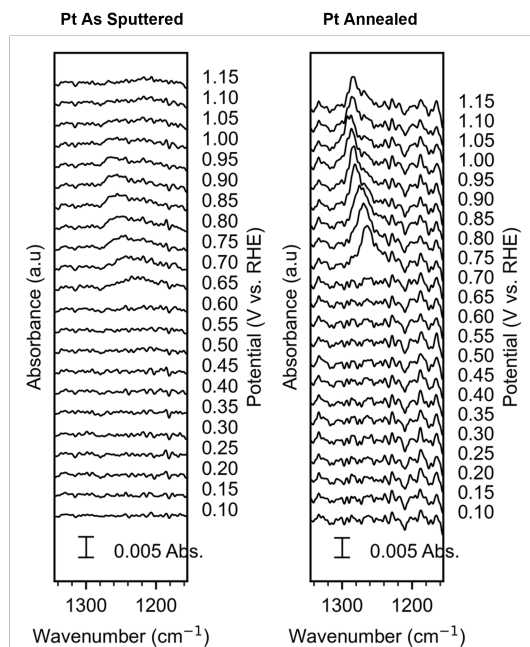

Figure S4: In Situ FTIR sulfate band spectra of Pt as sputtered (left) and Pt annealed (right) samples. Collected in 0.5M sulfuric acid Ar purged electrolyte during CO stripping. Reference potential 1.2 V vs. RHE.

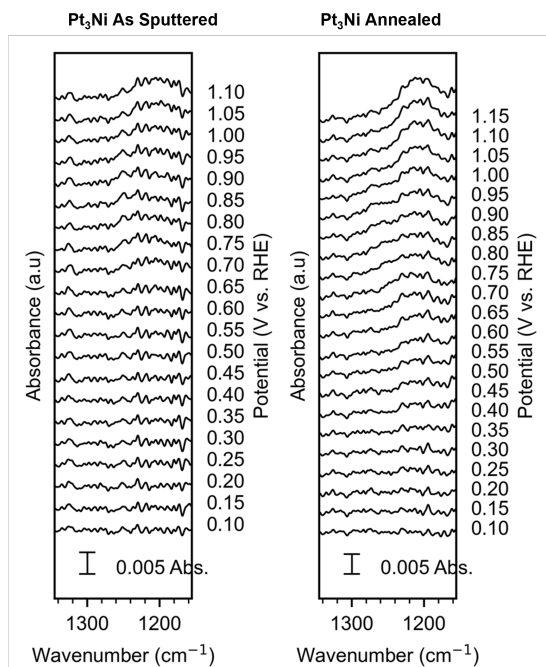

Figure S5: In Situ FTIR sulfate band spectra of Pt<sub>3</sub>Ni as sputtered (left) and Pt<sub>3</sub>Ni annealed (right) samples. Collected in 0.5M sulfuric acid Ar purged electrolyte during CO stripping. Reference potential 1.2 V vs. RHE.

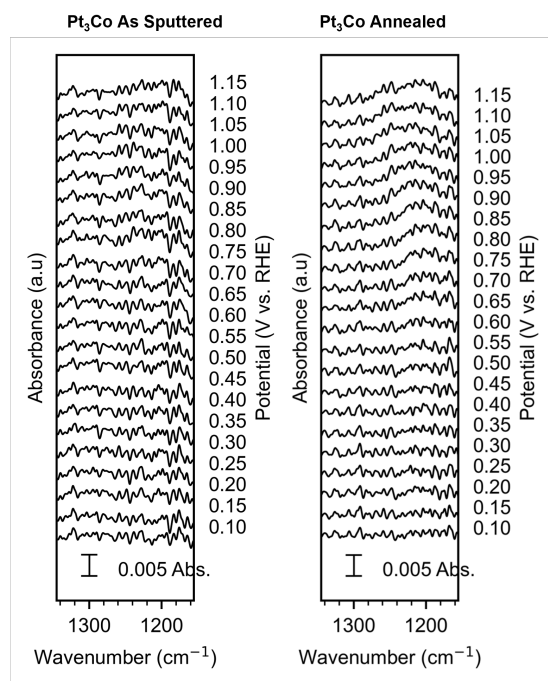

Figure S6: In Situ FTIR sulfate band spectra of Pt<sub>3</sub>Co as sputtered (left) and Pt<sub>3</sub>Co annealed (right) samples. Collected in 0.5M sulfuric acid Ar purged electrolyte during CO stripping. Reference potential 1.2 V vs. RHE.
